# Supplementary material for: A Combination of Transcriptional and MicroRNA Regulation Improves the Stability of the Relative Concentrations of Target Genes
Source: PLoS Comput Biol. 2014 Feb 27;10(2):e1003490. doi: 10.1371/journal.pcbi.1003490 (PMC3937125; doi:10.1371/journal.pcbi.1003490)
Supplement: Table S4 — List of micFFL where transcription factor targets another transcription factor. (XLS) [file pcbi.1003490.s004.xls]

## Sheet: Sheet1
miRNA	TG=TF	Ref. miR_TG	TF	Ref. miR_TF	Ref. TF_TG	Action TF_TG	Source TF_TG
mir-124-3p	SNAI2	22253443	AR	22386953	16541421;	UP	TFact_SL_SS
mir-138	PPARG	20486779	CEBPA	20486779	15632071; 16580992; 19059241;	UP	TFact_SL_SS
mir-155	SPI1	19386588	CEBPB	19887047	22955619	NA	ENCODE_data
mir-34a	SPI1	20598588	CEBPB	20598588	22955619	NA	ENCODE_data
mir-155	HIF1A	18299402	CTNNB1	18668040	;16959035	DOWN	TFact_SL_SS
mir-106a	CDKN1A	19782699	E2F1	20643754	;10030670;	UP	TFact_SL_SS
mir-106b	CDKN1A	19422085	E2F1	19486339	;10030670;	UP	TFact_SL_SS
mir-17-5p	CDKN1A	--	E2F1	--	;10030670;	UP	TFact_SL_SS
mir-93	CDKN1A	19422085	E2F1	19486339	;10030670;	UP	TFact_SL_SS
mir-34a	MYB	19584398	E2F1	17875987	;7929342; 16299810	UP	TFact_SL_SS
mir-17	NCOA3	18700987	E2F1	18521848	;16916939	UP	TFact_SL_SS
mir-21	NCOA3	19528081	E2F1	19906824	;16916939	UP	TFact_SL_SS
mir-98	NCOA3	19528081	E2F1	19528081	;16916939	UP	TFact_SL_SS
mir-106a	RB1	19175831	E2F1	20643754	;8264596; 16738312; 22955619	UP	Tfact_SL_SS;ENCODE_data
mir-106b	RB1	19175831	E2F1	19486339	;8264596; 16738312; 22955619	UP	Tfact_SL_SS;ENCODE_data
mir-17	RB1	21283765	E2F1	19486340	;8264596; 16738312; 22955620	UP	Tfact_SL_SS;ENCODE_data
mir-20a	RB1	21283765	E2F1	19110058	;8264596; 16738312; 22955621	UP	Tfact_SL_SS;ENCODE_data
mir-23b	RB1	20133741	E2F1	20133741	;8264596; 16738312; 22955622	UP	Tfact_SL_SS;ENCODE_data
mir-34a	YY1	21182263	E2F1	17875987	;16918502	DOWN	TFact_SL_SS
mir-24	CDKN2A	18365017	E2F2	19748357	;11883935	UP	TFact_SL_SS
mir-106b	CDKN1A	19422085	E2F3	21283765	;10030670;	UP	TFact_SL_SS
mir-125b	CDKN2A	20347935	E2F3	20549700	;11883935; 15175242	UP	TFact_SL_SS
mir-200b	ETS1	21081489	EP300	19569050	22955619	NA	ENCODE_data
mir-182	RARG	19782699	EP300	19569050	22955619	NA	ENCODE_data
mir-200b	ZEB1	18411277	EP300	19569050	22955619	NA	ENCODE_data
mir-200c	ZEB1	19502803	EP300	19569050	22955619	NA	ENCODE_data
mir-429	ZEB1	18411277	EP300	19569050	22955619	NA	ENCODE_data
mir-20b	CDKN1A	18212054	ESR1	19706389	TRED	NA	TFact_SL
mir-221	FOS	20299489	ESR1	18790736	TRED	NA	TFact_SL
mir-222	FOS	20299489	ESR1	18790736	TRED	NA	TFact_SL
mir-222	STAT5	20489169	ESR1	18790736	TRED;Pubmed	UP	TFactS
mir-208a	CDKN1A	20190813	ETS1	20576608	TRED	NA	TFact_SL
mir-155	MYB	21062812	ETS1	19193853	TRED	NA	TFact_SL
mir-182	CDKN1A	20190813	FOXO1	19574223	;17609436;	UP	TFact_SL_SS
mir-96	CDKN1A	19422085	FOXO1	20028871	;17609436;	UP	TFact_SL_SS
mir-221	ESR1	18790736	FOXO3	20388878	Pazar	NA	TFact_SL
mir-222	ESR1	18790736	FOXO3	20388878	Pazar	NA	TFact_SL
mir-23a-3p	PPARGC1A	22318941	FOXO3	22084234	;17390079;	UP	TFact_SL_SS
mir-34a	MYB	19584398	HNF4A	20018894	22955619	NA	ENCODE_data
mir-34c-5p	MYB	19461653	HNF4A	22232426	22955619	NA	ENCODE_data
mir-520h	CDKN1A	20190813	ID1	19435428	;17639499	UP	TFact_SL_SS
mir-125b	CDKN2A	20347935	ID1	18056640	;17639499	UP	TFact_SL_SS
mir-125b	CDKN2A	20347935	ID2	18056640	;17639499	UP	TFact_SL_SS
mir-520h	CDKN1A	20190813	ID3	19435428	;17639499	UP	TFact_SL_SS
mir-125b	CDKN2A	20347935	ID3	18056640	;17639499	UP	TFact_SL_SS
mir-15a	MYB	18818396	JUN	18362358	S2252;	UP	TFact_SL_SS
mir-16	MYB	21205891	JUN	18362358	S2252;	UP	TFact_SL_SS
mir-182	CDKN1A	20190813	MITF	17597072	;1999537;19067971	DOWN	TFact_SL_SS
mir-96	CDKN1A	19422085	MITF	17597072	;1999537;19067971	DOWN	TFact_SL_SS
let-7g	CDKN2A	20309945	MYC	20309945	;11062467	UP	TFact_SL_SS
mir-24	CDKN2A	18365017	MYC	19748357	;11062467	UP	TFact_SL_SS
mir-34a-5p	FOSL1	22198213	MYC	21297663	TRED	NA	TFact_SL
mir-17	HIF1A	18632605	MYC	18695042	TRED	NA	TFact_SL
mir-20a	HIF1A	18632605	MYC	18695042	TRED	NA	TFact_SL
mir-17	NCOA3	18700987	MYC	18695042	22955619	NA	ENCODE_data
mir-18a	NCOA3	19706389	MYC	19167416	22955619	NA	ENCODE_data
mir-21	NCOA3	19528081	MYC	19528081	22955619	NA	ENCODE_data
mir-98	NCOA3	19528081	MYC	19528081	22955619	NA	ENCODE_data
mir-34a	SPI1	20598588	MYC	20212154	22955619	NA	ENCODE_data
mir-146a	BRCA2	18660546	NFKB1	18504431	TRED	NA	TFact_SL
mir-124	HES1	20036862	NR3C1	19131573	22955619	NA	ENCODE_data
mir-9	ETS1	19956200	POU2F2	19956200	TRED	NA	TFact_SL
mir-20b	CDKN1A	18212054	PPARG	21042576	TRED	NA	TFact_SL
mir-125b	ID3	18056640	PRDM1	20497960	22955619	NA	ENCODE_data
mir-125b	IRF4	20497960	PRDM1	20497960	22955619	NA	ENCODE_data
mir-34a-5p	NANOG	22020437	SOX2	22020437	;15860457	UP	TFact_SL_SS
mir-34b-3p	NANOG	22020437	SOX2	22020437	;15860457	UP	TFact_SL_SS
mir-34c-5p	NANOG	22020437	SOX2	22020437	;15860457	UP	TFact_SL_SS
mir-29b	NCOA3	19706389	SP1	19913496	22955619	NA	ENCODE_data
mir-124	NR3C1	19131573	SP1	15685193	;12039077	UP	TFact_SL_SS
mir-124	RELA	15685193	SP1	15685193	TRED	NA	TFact_SL
mir-27a	SP3	18006846	SP1	18006846	pazar	NA	TFact_SL
mir-155	FLI1	18950466	SPI1	19386588	pazar_pleiades_20100814	NA	TFact_SL
mir-155	MYB	21062812	SPI1	19386588	pazar_pleiades_20100814	NA	TFact_SL
mir-34a	MYB	19584398	SPI1	20598588	pazar_pleiades_20100814	NA	TFact_SL
mir-424	MYB	21062812	SPI1	20972335	pazar_pleiades_20100814	NA	TFact_SL
mir-146a	CDKN1A	20101223	STAT1	19333922	;10866323	UP	TFact_SL_SS
mir-20b	CDKN1A	18212054	STAT3	20232316	TRED	NA	TFact_SL
mir-125b	ID1	18056640	STAT3	17891175	22955619	NA	ENCODE_data
mir-204	CDX2	21225631	TCF12	21282569	22955619	NA	ENCODE_data
mir-204	HOXA10	18308931	TCF12	21282569	22955619	NA	ENCODE_data
mir-204	MEIS2	20713703	TCF12	21282569	22955619	NA	ENCODE_data
mir-211-5p	POU3F2	21435193	TCF12	22523078	22955619	NA	ENCODE_data
mir-125b-5p	BCL3	20658525	TP53	21935352	;12808109	DOWN	TFact_SL_SS
mir-125a-5p	CDKN1A	20190813	TP53	19818772	pazar_ABS;pazar_pleiades;	UP	TFact_SL_SS
mir-125a	CDKN1A	20190813	TP53	19818772	pazar_ABS;pazar_pleiades;	UP	TFact_SL_SS
mir-15a	MYB	18818396	WT1	18362358	trrd;TRED	NA	TFact_SL
mir-16	MYB	21205891	WT1	18362358	trrd;TRED	NA	TFact_SL
